# Supplementary material for: Superhard bulk C4N3 compounds with metal-free magnetism assembled from two-dimensional C4N3: a first-principles study
Source: Royal Society of Chemistry journal article supplement (doi:10.1039/d3cp01619f), 2023-01-01
Supplement: d3cp01619f1.pdf [file d3cp01619f1.pdf]

## Supporting information for

### “Superhard carbon nitride with metal-free magnetism assembled from two-dimensional C<sub>4</sub>N<sub>3</sub>: a first-principles study”

Haiping Wu,<sup>\*a,b</sup> Yuelin Li,<sup>a</sup> Yan Qian,<sup>\*a,b</sup> and Erjun Kan<sup>a,b</sup>

<sup>a</sup>Department of Applied Physics, Nanjing University of Science and Technology,  
Nanjing  
210094, China

<sup>b</sup>MIIT Key Laboratory of Semiconductor Microstructure and Quantum Sensing,  
Nanjing  
University of Science and Technology, Nanjing 210094, China

Corresponding author: mrhpwu@njust.edu.cn, [qianyan@njust.edu.cn](mailto:qianyan@njust.edu.cn)

Table S1. The crystallographic information of the six systems, including crystal parameters, fractional atomic coordinates, is listed below.

Cm-I: a=b=4.9897, c=10.2518,  $\alpha = \beta = 134.5624$ ,  $\gamma = 60.8673$

| Atom | x        | y        | z        |
|------|----------|----------|----------|
| C1   | 0.40436  | -0.11212 | -0.09017 |
| C    | 0.21669  | -0.29753 | -0.44160 |
| C    | -0.95201 | -0.45803 | -0.76102 |
| N    | -0.67650 | -0.19484 | -0.00673 |
| N    | -0.81837 | -0.36319 | -0.33677 |
| N    | -0.05081 | -0.54721 | -0.68973 |
| C    | 0.29144  | -0.70857 | -0.02436 |
| C    | 0.40318  | -0.59682 | -0.08410 |
| C    | 0.14304  | -0.85696 | -0.34441 |
| N    | -0.41773 | -0.41773 | -0.42291 |
| N    | -0.53539 | -0.53539 | -0.64420 |
| C    | -0.76039 | -0.76039 | -0.41971 |
| C    | -0.02247 | -0.02247 | -0.66973 |
| C    | -0.95104 | -0.95104 | -0.76607 |
| N    | -0.19029 | -0.19029 | -0.00565 |

Cm-II: a=b=4.9043, c=4.0476,  $\alpha = \beta = 93.7759$ ,  $\gamma = 62.6579$

| Atom | x       | y        | z       |
|------|---------|----------|---------|
| C    | 0.54333 | 0.02835  | 0.95329 |
| C    | 0.35048 | -0.13620 | 0.41687 |
| N    | 0.40357 | -0.14680 | 0.06849 |
| N    | 0.48988 | -0.96154 | 0.58845 |
| C    | 0.36535 | -0.63465 | 0.08524 |
| C    | 0.54204 | -0.45796 | 0.94933 |

|   |          |          |         |
|---|----------|----------|---------|
| C | 0.52697  | -0.47303 | 0.57018 |
| C | 0.35142  | -0.64858 | 0.46577 |
| N | 0.89116  | -0.10884 | 0.04569 |
| N | -0.00446 | -0.00446 | 0.41649 |

Cm-III: a=b=4.8130,c= 4.2925,  $\alpha = \beta = 88.7375,\gamma = 63.0970$

| Atom | x       | y        | z       |
|------|---------|----------|---------|
| C    | 0.05112 | 0.53499  | 0.92309 |
| C    | 0.80494 | -0.71636 | 0.59235 |
| N    | 0.23686 | 0.70919  | 0.90777 |
| N    | 0.99869 | -0.54437 | 0.60557 |
| C    | 0.72092 | -0.27908 | 0.04461 |
| C    | 0.53707 | -0.46293 | 0.06583 |
| N    | 0.98553 | -0.01447 | 0.44753 |
| C    | 0.48470 | 0.48470  | 0.41528 |
| C    | 0.29322 | 0.29322  | 0.43312 |
| N    | 0.23982 | 0.23982  | 0.11010 |

P1: a=4.99,b= 4.95,c= 5.03,  $\alpha = 113.10,\beta = 80.30,\gamma = 120.33$

| Atom | x      | y      | Z      |
|------|--------|--------|--------|
| C    | 0.552  | 0.514  | -0.163 |
| C    | -0.084 | -0.257 | -0.126 |
| C    | 0.392  | 0.136  | -0.334 |
| C    | 0.384  | 0.678  | -0.239 |
| N    | 0.087  | 0.049  | -0.193 |
| N    | 0.086  | -0.439 | -0.201 |
| N    | 0.558  | -0.054 | -0.344 |

C2/m: a=b= 4.9400,c= 4.1623,  $\alpha = \beta = 83.9437,\gamma = 60.7075$

| Atom | x        | y        | z       |
|------|----------|----------|---------|
| C    | -0.17628 | -0.66072 | 0.18101 |
| N    | -0.35723 | -0.83299 | 0.18872 |
| C    | -0.85129 | 0.14871  | 0.30154 |
| C    | -0.67203 | 0.32797  | 0.34018 |
| N    | -0.35876 | -0.35876 | 0.31376 |

P-6m2:a= b=5.0060,c= 4.0499, ,  $\alpha = \beta = 90,\gamma = 120$

| Atom | x       | y       | z       |
|------|---------|---------|---------|
| C    | 0.66667 | 0.33333 | 0.18848 |
| C    | 0.01503 | 0.50751 | 0.30629 |
| N    | 0.17237 | 0.34474 | 0.18618 |

Table S2: The corresponding mechanical stability criteria for the triclinic, Monoclinic, and hexagonal crystal systems.

For triclinic system (P1):

$$C_{11} > 0,$$

$$C_{11}C_{22} - C_{12}^2 > 0$$

$$\begin{vmatrix} C_{11} & C_{12} & C_{13} \\ C_{12} & C_{22} & C_{23} \\ C_{13} & C_{23} & C_{33} \end{vmatrix} > 0, \quad \begin{vmatrix} C_{11} & C_{12} & C_{13} & C_{14} \\ C_{12} & C_{22} & C_{23} & C_{24} \\ C_{13} & C_{23} & C_{33} & C_{34} \\ C_{14} & C_{24} & C_{34} & C_{44} \end{vmatrix} > 0, \quad \begin{vmatrix} C_{11} & C_{12} & C_{13} & C_{14} & C_{15} \\ C_{12} & C_{22} & C_{23} & C_{24} & C_{25} \\ C_{13} & C_{23} & C_{33} & C_{34} & C_{35} \\ C_{14} & C_{24} & C_{34} & C_{44} & C_{45} \\ C_{15} & C_{25} & C_{35} & C_{45} & C_{55} \end{vmatrix} > 0, \quad \begin{vmatrix} C_{11} & C_{12} & C_{13} & C_{14} & C_{15} & C_{16} \\ C_{12} & C_{22} & C_{23} & C_{24} & C_{25} & C_{26} \\ C_{13} & C_{23} & C_{33} & C_{34} & C_{35} & C_{36} \\ C_{14} & C_{24} & C_{34} & C_{44} & C_{45} & C_{46} \\ C_{15} & C_{25} & C_{35} & C_{45} & C_{55} & C_{56} \\ C_{16} & C_{26} & C_{36} & C_{46} & C_{56} & C_{66} \end{vmatrix} > 0$$

For monoclinic systems (Cm and C2/m):

$$C_{11} > 0, C_{22} > 0, C_{33} > 0, C_{44} > 0, C_{55} > 0, C_{66} > 0,$$

$$[C_{11} + C_{22} + C_{33} + 2(C_{12} + C_{13} + C_{23})] > 0,$$

$$(C_{33}C_{55} - C_{35}^2) > 0, (C_{44}C_{66} - C_{46}^2) > 0, (C_{22} + C_{33} - 2C_{23}) > 0,$$

$$[C_{22}(C_{33}C_{55} - C_{35}^2) + 2C_{23}C_{25}C_{35} - C_{23}^2C_{55} - C_{25}^2C_{33}] > 0,$$

$$\{2[C_{15}C_{25}(C_{33}C_{12} - C_{13}C_{23}) + C_{15}C_{35}(C_{22}C_{13} - C_{12}C_{23}) + C_{25}C_{35}(C_{11}C_{23} - C_{12}C_{13})] - [C_{15}^2(C_{22}C_{33} - C_{23}^2) + C_{25}^2(C_{11}C_{33} - C_{13}^2) + C_{35}^2(C_{11}C_{22} - C_{12}^2)] + C_{55}g\} > 0$$

$$g = C_{11}C_{22}C_{33} - C_{11}C_{23}^2 - C_{22}C_{13}^2 - C_{33}C_{12}^2 + 2C_{12}C_{13}C_{23},$$

For the hexagonal system (P-6m2):

$$C_{11} > |C_{12}|, C_{44} > 0, 2C_{13}^2 < C_{33}(C_{11} + C_{12})$$

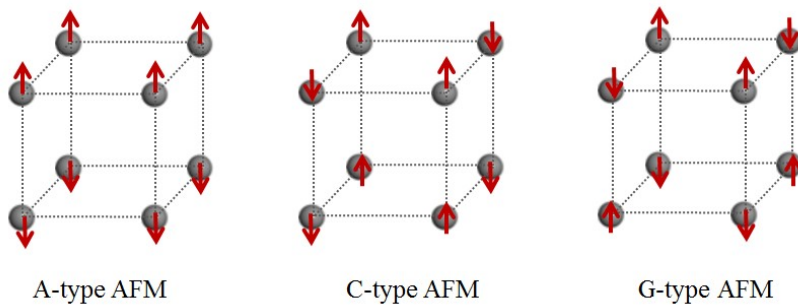

**Fig. S1.** The diagram of three types of anti-ferromagnetic configurations (A-type, C-type, and G-type) considered in this work.
